# Supplementary material
Source: Royal Society of Chemistry journal article supplement (doi:10.1039/d5nj04837k)
Supplement: d5nj04837k1.pdf [file d5nj04837k1.pdf]

## Supplementary Information

### $\gamma$ -Graphyne modulated g-C<sub>3</sub>N<sub>4</sub> nanostructures for boosted photocatalytic ammonia production

#### List of Contents

##### Chemicals and materials

**Fig. S1** Schematic diagram of preparation process of CNNS/GY.

**Fig. S2** The schematic picture of the used reactor system.

**Fig. S3** Colorimetric photos of the solution at different ammonia nitrogen concentrations.

**Fig. S4** Determination of ammonia nitrogen standard curve.

**Fig. S5** Time-dependent NH<sub>4</sub><sup>+</sup> concentrations generated by CN and CNNS.

**Fig. S6** XRD patterns of CNNS/GY composites before and after three recycles.

**Fig. S7** The theoretical model of the CNNS/GY heterostructure.

**Fig. S8** Partial density of states (PDOS) of the CNNS/GY heterostructure before and after N<sub>2</sub> adsorption.

**Table 1** Corresponding absorbance of ammonia nitrogen standard solution.

## **Chemicals and materials**

Most chemicals were purchased from Sinopharm Chemical Reagent Co. Ltd, including melamine (CP), benzene/hexahydrobenzene (CP), benzene ( $\geq 99.5\%$ , AR), absolute ethanol (AR),  $\text{HNO}_3$  (68 wt.%, AR), anhydrous sodium sulfate (AR), methanol ( $\geq 99.5\%$ , AR), ammonium chloride ( $\geq 99.5\%$ , CP), potassium sodium tartrate ( $\geq 99.5\%$ , AR) and Nessler's reagent. Fluorine-doped tin oxide (FTO) conducting glasses were obtained from Foshan City Mei jing Glass Co. Ltd. Nafion (5 wt.%) and  $\text{CaC}_2$  ( $\geq 80\%$ ) were gained from Sigma-Aldrich (USA).  $\text{N}_2$  (99.5 %) and Ar (99.5 %) were supplied from Shanghai Haoqi Gases Co., Ltd. They were used as received, without any further treatment.

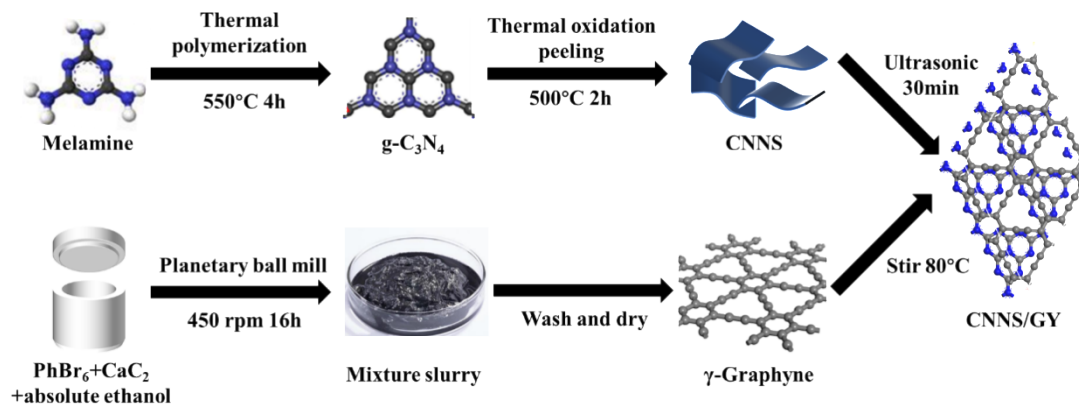

Fig. S1 Schematic diagram of preparation process of CNNS/GY

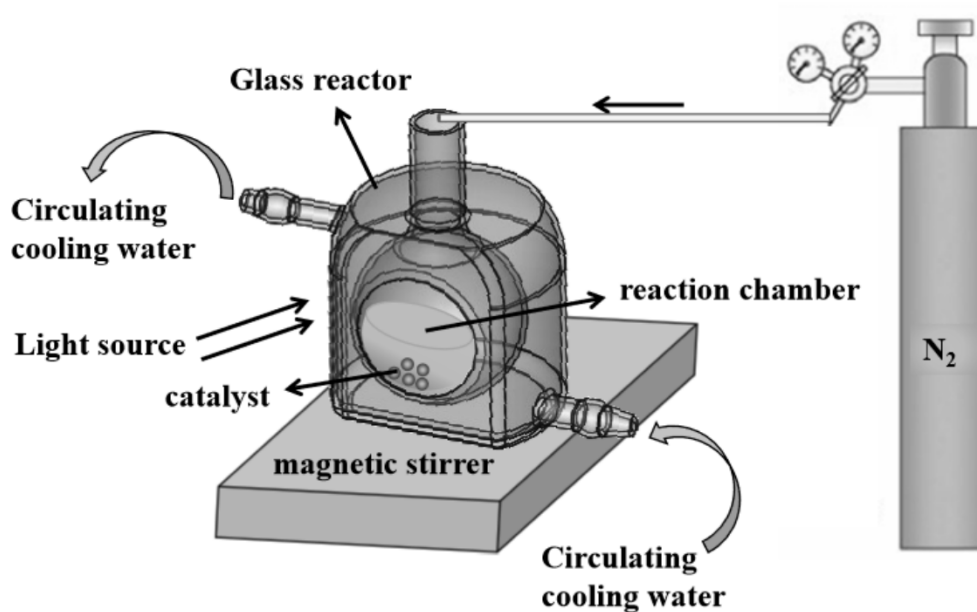

Fig. S2 The schematic picture of the used reactor system.

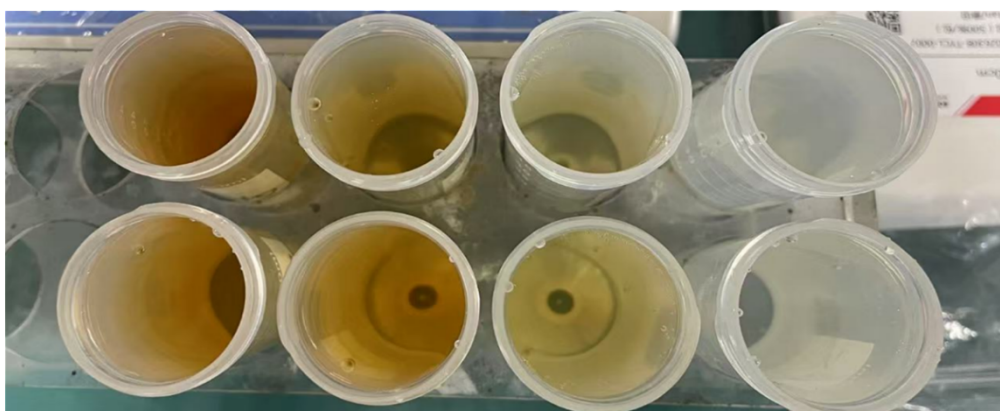

Fig. S3 Colorimetric photos of the solution at different ammonia nitrogen concentrations.

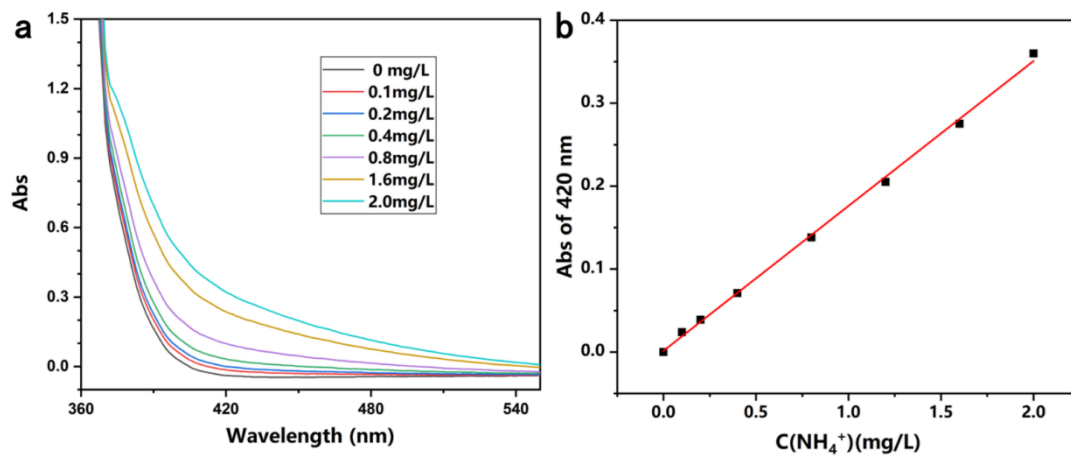

**Fig. S4** Determination of ammonia nitrogen standard curve. (a) Absorption spectra of  $\text{NH}_4^+$  standard solutions, (b) Linear plot of the absorbance values at 420 nm versus  $\text{NH}_4^+$  concentration.

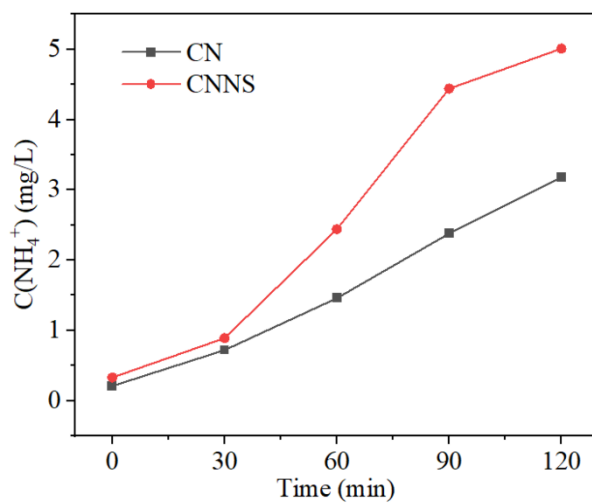

**Fig. S5** Time-dependent  $\text{NH}_4^+$  concentrations generated by CN and CNNS.

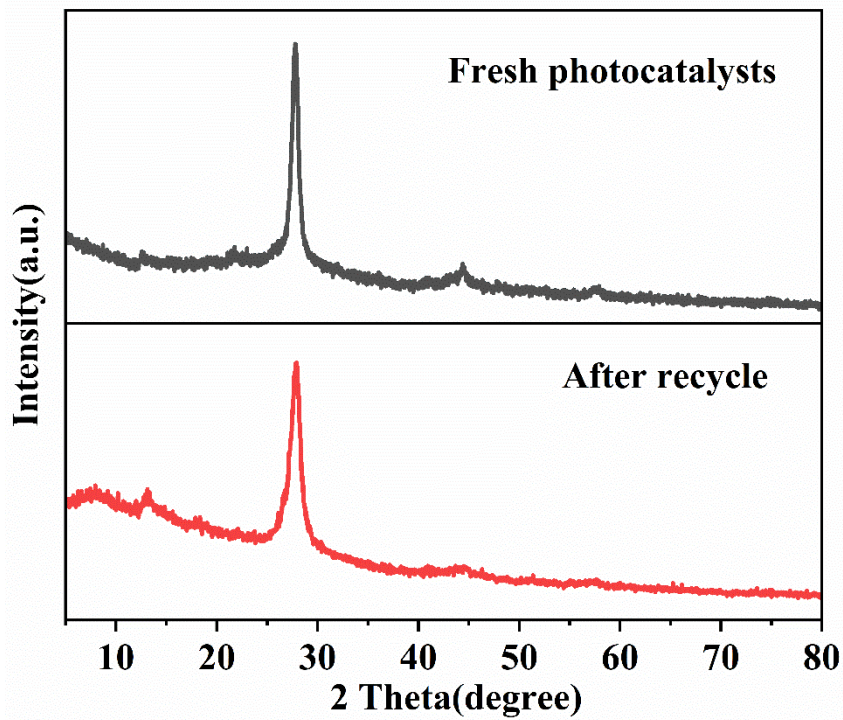

Fig. S6 XRD patterns of CNNS/GY composites before and after three recycles.

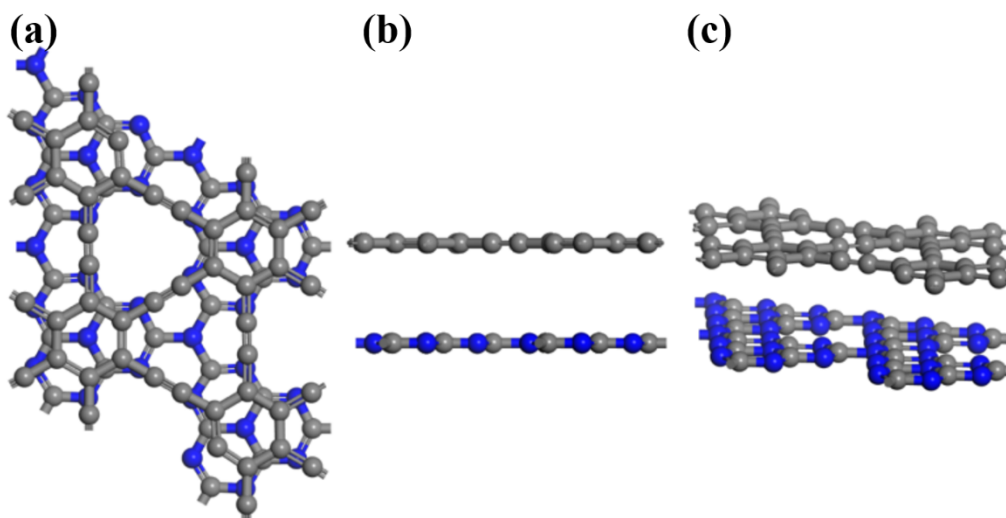

Fig. S7 Theoretical models of the CNNS/GY electronic structure: (a) top view; (b) side view; (c) oblique view.

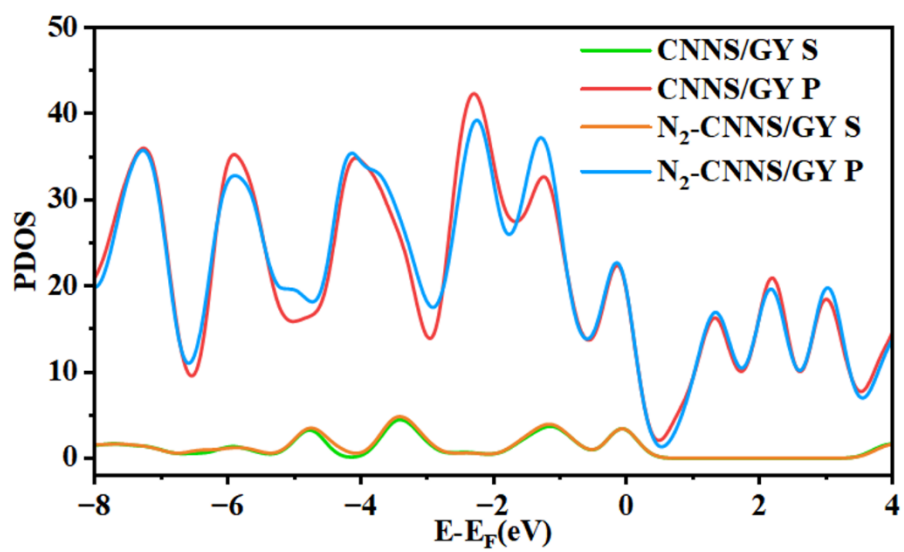

**Fig. S8** Partial density of states (PDOS) of the CNNS/GY heterostructure before and after N<sub>2</sub> adsorption.

**Table 1** Corresponding absorbance of ammonia nitrogen standard solution

| <b>Concentration (mg/L)</b> | <b>Actual Absorbance (Abs)</b> |
|-----------------------------|--------------------------------|
| 0                           | 0                              |
| 0.1                         | 0.024                          |
| 0.2                         | 0.039                          |
| 0.4                         | 0.071                          |
| 0.8                         | 0.138                          |
| 1.2                         | 0.205                          |
| 1.6                         | 0.275                          |
| 2.0                         | 0.360                          |
